# Supplementary material for: Outcomes of pulmonary vasodilator use in Veterans with pulmonary hypertension associated with left heart disease and lung disease
Source: PubMed Central journal article supplement — Pulm Circ. 2021 Apr 1;11(2):20458940211001714. doi: 10.1177/20458940211001714 (PMC8020250; doi:10.1177/20458940211001714), 2021-04-01
Supplement: sj-pdf-1-pul-10.1177_20458940211001714.pdf [file sj-pdf-1-pul-10.1177_20458940211001714.pdf]

## Supplementary Material

**e-Figure 1:** Sample derivation for cohort study of Medicare-eligible Veterans with Groups 2 and 3 PH

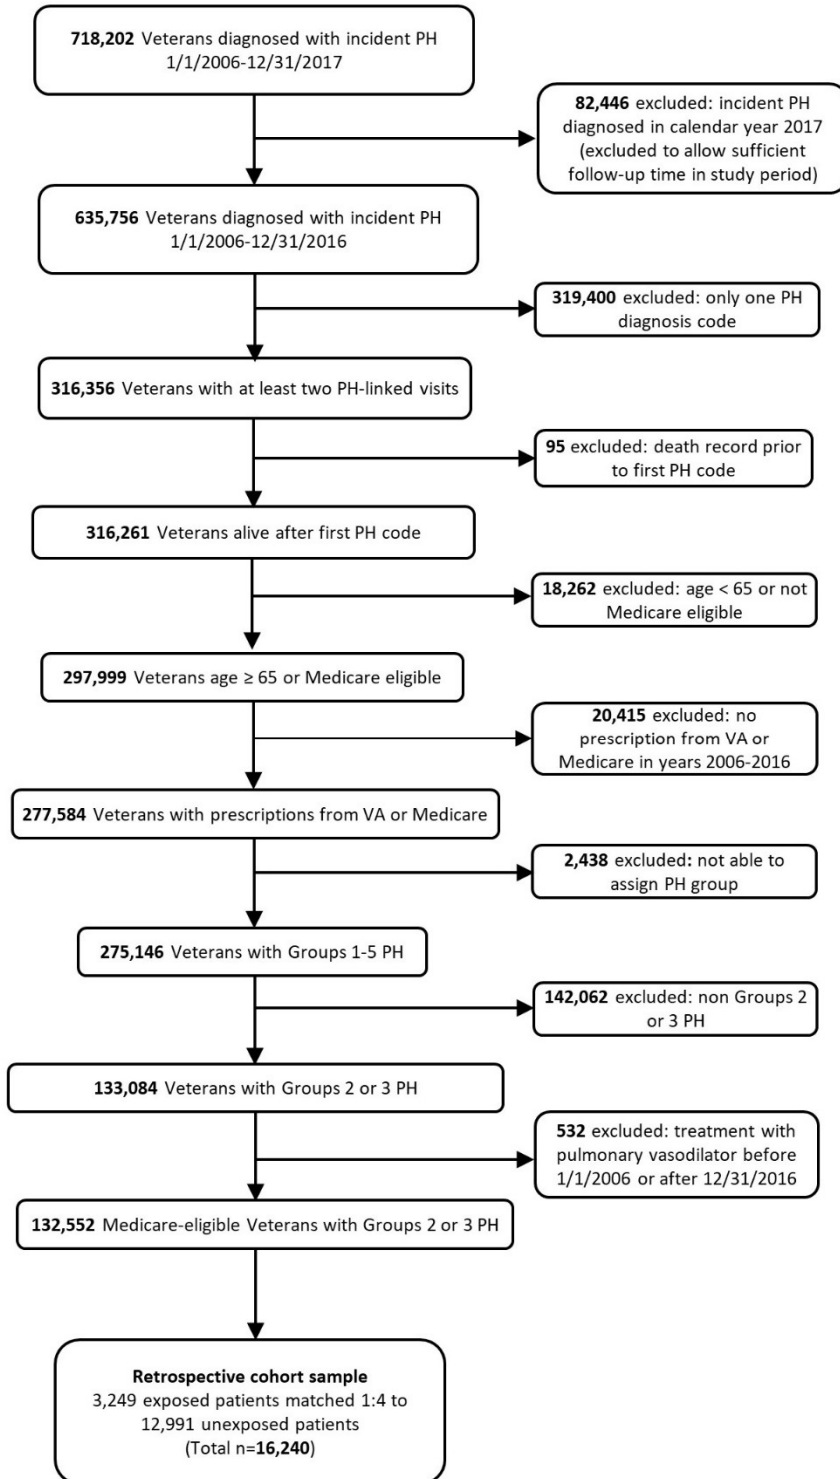

**e-Figure 2: Sample derivation for case-control study of Medicare-eligible Veterans with Groups 2 and 3 PH**

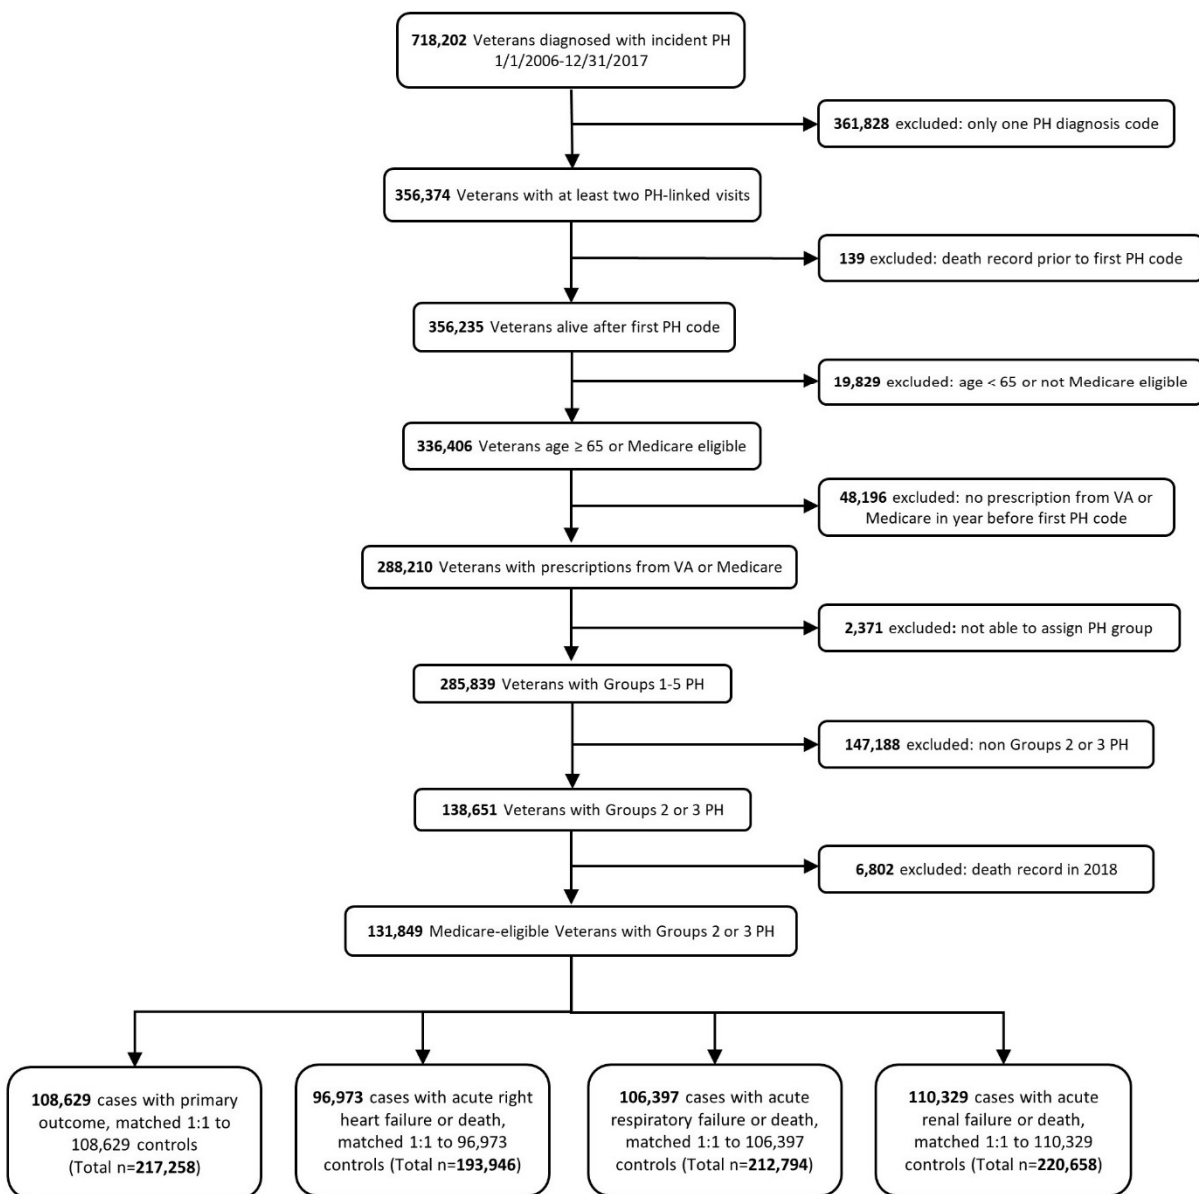

| <b>e-Table 1. Pulmonary vasodilators included in exposure definition</b> |
|--------------------------------------------------------------------------|
| <b>Phosphodiesterase-5-inhibitors</b>                                    |
| Sildenafil                                                               |
| Revatio                                                                  |
| Tadalafil                                                                |
| Adcirca                                                                  |
| Vardenafil                                                               |
| Levitra                                                                  |
| <b>Endothelin receptor antagonists</b>                                   |
| Ambrisentan                                                              |
| Letairis                                                                 |
| Bosentan                                                                 |
| Tracleer                                                                 |
| Macitentan                                                               |
| Opsumit                                                                  |
| <b>Prostacyclin analogs</b>                                              |
| Epoprostenol                                                             |
| Velettri                                                                 |
| Epoprostenol sodium                                                      |
| Flolan                                                                   |
| Iloprost                                                                 |
| Ventavis                                                                 |
| Treprostenil                                                             |
| Remodulin                                                                |
| Tyvaso                                                                   |
| Orenitram                                                                |
| Selexipag                                                                |
| Uptravi                                                                  |
| <b>Soluble guanylate cyclase stimulators</b>                             |
| Riociguat                                                                |
| Adempas                                                                  |

| <b>e-Table 2: Full list of variables included in multivariable models</b> |                                                                                                                                                                       |
|---------------------------------------------------------------------------|-----------------------------------------------------------------------------------------------------------------------------------------------------------------------|
| <b>Variable</b>                                                           | <b>Description</b>                                                                                                                                                    |
| <i>Patient characteristics</i>                                            |                                                                                                                                                                       |
| Age                                                                       | Age at index date*                                                                                                                                                    |
| Sex                                                                       | Male or female                                                                                                                                                        |
| Race / ethnicity                                                          | Categorized as White, Black, Hispanic, or other <sup>†</sup>                                                                                                          |
| Marital status                                                            | In year of index date, categorized as married or other <sup>‡</sup>                                                                                                   |
| VA benefits (priority status)                                             | Categorized as highly disabled, low/moderately disabled, no service-connected disability with no copayments due to income (poverty), limited benefits with copayments |
| Body mass index                                                           | Most recent before index date, categorized as underweight, normal, overweight, Class I obesity, Class II or III obesity                                               |
| Elixhauser comorbidity index                                              | Sum of 31 comorbidity groups                                                                                                                                          |
| <i>Recent acute organ failure<sup>§</sup></i>                             |                                                                                                                                                                       |
| Acute left heart failure                                                  | Single inpatient principal code or primary emergency room code in VA or Medicare in the 90 days before or on the index date                                           |
| Acute right heart failure                                                 | “                                                                                                                                                                     |
| Acute respiratory failure                                                 | “                                                                                                                                                                     |
| Acute renal failure                                                       | “                                                                                                                                                                     |
| <i>Comorbidities</i>                                                      |                                                                                                                                                                       |
| Major adverse cardiac event <sup>¶</sup>                                  | Single inpatient principal code or primary emergency room code in VA or Medicare any time before or on the index date                                                 |
| Stroke                                                                    | “                                                                                                                                                                     |
| Congestive heart failure                                                  | ≥ 2 days with inpatient or outpatient codes in VA or Medicare in the 731 days before or on the index date                                                             |
| Arrhythmia                                                                | “                                                                                                                                                                     |
| Coronary atherosclerosis                                                  | “                                                                                                                                                                     |
| Transient ischemic attack                                                 | “                                                                                                                                                                     |
| Chronic lung disease <sup>#</sup>                                         | “                                                                                                                                                                     |
| Interstitial lung disease                                                 | “                                                                                                                                                                     |
| Obstructive sleep apnea                                                   | “                                                                                                                                                                     |
| Pneumonia                                                                 | “                                                                                                                                                                     |
| Hypertension                                                              | “                                                                                                                                                                     |
| Hyperlipidemia                                                            | “                                                                                                                                                                     |
| Peripheral vascular disease                                               | “                                                                                                                                                                     |
| Venous thromboembolism                                                    | “                                                                                                                                                                     |
| Diabetes                                                                  | “                                                                                                                                                                     |
| Chronic kidney disease                                                    | “                                                                                                                                                                     |
| Hepatitis C                                                               | “                                                                                                                                                                     |
| Cirrhosis                                                                 | “                                                                                                                                                                     |
| Malignancy                                                                | “                                                                                                                                                                     |

|                                                                                                                                                                                                                                                           |                                                                                                                                                                                       |
|-----------------------------------------------------------------------------------------------------------------------------------------------------------------------------------------------------------------------------------------------------------|---------------------------------------------------------------------------------------------------------------------------------------------------------------------------------------|
| Anemia                                                                                                                                                                                                                                                    | “                                                                                                                                                                                     |
| Thyroid disease                                                                                                                                                                                                                                           | “                                                                                                                                                                                     |
| Arthritis                                                                                                                                                                                                                                                 | “                                                                                                                                                                                     |
| Dementia                                                                                                                                                                                                                                                  | “                                                                                                                                                                                     |
| Neurodegenerative disease                                                                                                                                                                                                                                 | “                                                                                                                                                                                     |
| Depression                                                                                                                                                                                                                                                | “                                                                                                                                                                                     |
| Post-traumatic stress disorder                                                                                                                                                                                                                            | “                                                                                                                                                                                     |
| Schizophrenia                                                                                                                                                                                                                                             | “                                                                                                                                                                                     |
| Other psychiatric condition                                                                                                                                                                                                                               | “                                                                                                                                                                                     |
| Alcohol / substance use disorder                                                                                                                                                                                                                          | “                                                                                                                                                                                     |
| Tobacco use disorder                                                                                                                                                                                                                                      | “                                                                                                                                                                                     |
| <i>Healthcare utilization</i>                                                                                                                                                                                                                             | “                                                                                                                                                                                     |
| Right heart catheterization <sup>§</sup>                                                                                                                                                                                                                  | Performance of a right heart catheterization in the year before or on index date                                                                                                      |
| Outpatient visits                                                                                                                                                                                                                                         | Number of outpatient visit days in VA or Medicare in the year before or on index date                                                                                                 |
| Outpatient PH visits <sup>§</sup>                                                                                                                                                                                                                         | Number of outpatient visit days linked to a PH diagnosis code in VA or Medicare in the year before or on index date                                                                   |
| Outpatient visits in VA only                                                                                                                                                                                                                              | Number of Veterans with outpatient visits in VA only in year before or on index date                                                                                                  |
| Outpatient visits in both VA and Medicare                                                                                                                                                                                                                 | Number of Veterans with outpatient visits in both VA and Medicare in year before or on index date                                                                                     |
| No outpatient visits                                                                                                                                                                                                                                      | Number of Veterans with no outpatient visits in either VA or Medicare in year before or on index date                                                                                 |
| Hospitalizations                                                                                                                                                                                                                                          | Number of inpatient discharges in VA or Medicare in year before or on index date                                                                                                      |
| Urgent care or emergency room visits                                                                                                                                                                                                                      | Number of urgent or emergency room visit days in VA or Medicare in year before or on index date                                                                                       |
| Long-term VA care days                                                                                                                                                                                                                                    | Number of long-term care days in VA in year before or on index date                                                                                                                   |
| <i>Facility characteristics**</i>                                                                                                                                                                                                                         |                                                                                                                                                                                       |
| Region                                                                                                                                                                                                                                                    | Categorized as Northeast, South, Midwest, and West                                                                                                                                    |
| Rurality                                                                                                                                                                                                                                                  | Defined by the VA urban/rural designation                                                                                                                                             |
| Complexity rating <sup>††</sup>                                                                                                                                                                                                                           | Comprised of patient volume and risk, level of teaching and research, number of specialists, and level of intensive care units within the facility; divided into 1a, 1b, 1c, 2, and 3 |
| Definitions of abbreviations: PH=pulmonary hypertension; VA=Veterans Health Administration                                                                                                                                                                |                                                                                                                                                                                       |
| * Defined as first prescription for pulmonary vasodilator in the cohort study and first PH diagnosis code in the case-control study                                                                                                                       |                                                                                                                                                                                       |
| † Includes American Indian, Asian, Pacific Islander, unknown                                                                                                                                                                                              |                                                                                                                                                                                       |
| ‡ Includes separated, divorced, widowed, single, never married, unknown                                                                                                                                                                                   |                                                                                                                                                                                       |
| § Included in cohort study model only                                                                                                                                                                                                                     |                                                                                                                                                                                       |
| ¶ Including myocardial infarction, coronary revascularization, cardiac arrest                                                                                                                                                                             |                                                                                                                                                                                       |
| # Includes chronic obstructive lung disease, asthma, bronchiectasis, pneumoconiosis                                                                                                                                                                       |                                                                                                                                                                                       |
| **Patients were assigned to VA facilities based on the location of the most recent PH-associated visit on or before the index date                                                                                                                        |                                                                                                                                                                                       |
| ††1a-1c: high complexity of patient volume and risk, high volume of teaching and research; 2: moderate complexity of patient volume and risk; some teaching and research; 3: low complexity of patient volume and risk, little or no teaching or research |                                                                                                                                                                                       |
